# Supplementary material for: Nitric Oxide Modulates Ca2+ Leak and Arrhythmias via S-Nitrosylation of CaMKII
Source: PubMed Central journal article supplement — Circ Res. 2023 Nov 14;133(12):1040–55. doi: 10.1161/CIRCRESAHA.123.323571 (PMC10699507; doi:10.1161/circresaha.123.323571), 2023-11-14
Supplement: res-133-1040-s004.pdf [file res-133-1040-s004.pdf]

## Major Resources Table

In order to allow validation and replication of experiments, all essential research materials listed in the Methods should be included in the Major Resources Table below. Authors are encouraged to use public repositories for protocols, data, code, and other materials and provide persistent identifiers and/or links to repositories when available. Authors may add or delete rows as needed.

### Animals (in vivo studies)

| Species             | Vendor or Source | Background Strain         | Sex | Persistent ID / URL                                             |
|---------------------|------------------|---------------------------|-----|-----------------------------------------------------------------|
| Wild-type C57Bl/6J  | Otago BRF        | C57BL/6J                  | M/F |                                                                 |
| CaMKII $\delta$ -KO | Otago BRF        | C57BL/6J /<br>C57BL/6NCrl | M/F | Initial breeders were a gift from JHB (JCI Vol 119, No 5, 2009) |

### Genetically Modified Animals

|                 | Species                | Vendor or Source             | Background Strain | Other Information                      | Persistent ID / URL |
|-----------------|------------------------|------------------------------|-------------------|----------------------------------------|---------------------|
| Parent - Male   | Wild-type C57Bl/6J     | Otago BRF                    | C57BL/6J          | Colony maintained by Otago BRF         | 146418/7679         |
| Parent - Female | CaMKII $\delta$ -C273S | Australia Phenomics Facility | C57BL/6NCrl       | Progeny/colony maintained by Otago BRF | 143543//43          |

### Antibodies

| Target antigen                            | Vendor or Source | Catalog # | Working concentration | Lot # (preferred but not required) | Persistent ID / URL |
|-------------------------------------------|------------------|-----------|-----------------------|------------------------------------|---------------------|
| CaMKII delta Polyclonal                   | Thermo Fisher    | PA5-22168 | 1:5000 or 1:2000      |                                    | AB_11153337         |
| Ryanodine Receptor [34C]                  | Abcam            | ab2868    | 1:500                 |                                    | AB_2183051          |
| SERCA2a                                   | Badrilla         | A010-20   | 1:5000                |                                    | AB_2631042          |
| Goat anti-Mouse IgG (H+L) Secondary, HRP  | Thermo Fisher    | 31430     | 1:10000 or 1:20000    |                                    | AB_228307           |
| Goat anti-Rabbit IgG (H+L) Secondary, HRP | Thermo Fisher    | 31460     | 1:10000               |                                    | AB_228341           |
| GAPDH [GT239]                             | GeneTex          | GTX627408 | 1:10000               |                                    | AB_11174761         |
| HRP Anti-beta Actin antibody [AC-15]      | Abcam            | ab49900   | 1:20000               |                                    | AB_867494           |

### DNA/cDNA Clones

| Clone Name | Sequence | Source / Repository | Persistent ID / URL |
|------------|----------|---------------------|---------------------|
|            |          |                     |                     |
|            |          |                     |                     |
|            |          |                     |                     |

### Cultured Cells

| Name | Vendor or Source | Sex (F, M, or unknown) | Persistent ID / URL |
|------|------------------|------------------------|---------------------|
|      |                  |                        |                     |
|      |                  |                        |                     |

DOI [to be added]

|  |  |  |  |
|--|--|--|--|
|  |  |  |  |
|--|--|--|--|

**Other**

| <b>Description</b>                   | <b>Vendor or Source</b>    | <b>Persistent ID / URL</b>              |
|--------------------------------------|----------------------------|-----------------------------------------|
| Isoproterenol (hydrochloride)        | Merck                      | 420355                                  |
| S-Nitroso-L-glutathione (GSNO)       | Caymen Chemicals           | 82240                                   |
| Sodium nitroprusside dihydrate (SNP) | Sigma                      | 71778-25G                               |
| ODQ                                  | Tocris                     | 0880                                    |
| Collagenase type II                  | Worthington<br>Biochemical | LS004176                                |
| Isothesia NXT                        | Covetrus                   | Supplied by Otago Animal Welfare Office |
