# Supplementary material for: Nitric Oxide Modulates Ca2+ Leak and Arrhythmias via S-Nitrosylation of CaMKII
Source: PubMed Central journal article supplement — Circ Res. 2023 Nov 14;133(12):1040–55. doi: 10.1161/CIRCRESAHA.123.323571 (PMC10699507; doi:10.1161/circresaha.123.323571), 2023-11-14
Supplement: res-133-1040-s005.pdf [file res-133-1040-s005.pdf]

## CaMKII $\delta$ -KO

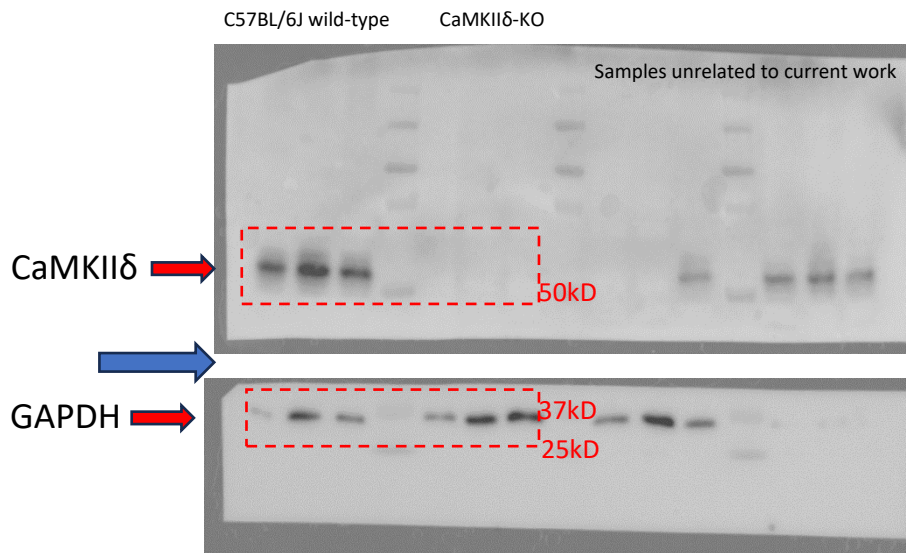

Full uncropped immunoblot of CaMKII $\delta$ -KO from **Figure 1C**. Blue arrows indicate where the membrane was cut. The red-dotted rectangle indicates the portion of the blot displayed in the manuscript.

**A****CaMKII $\delta$** 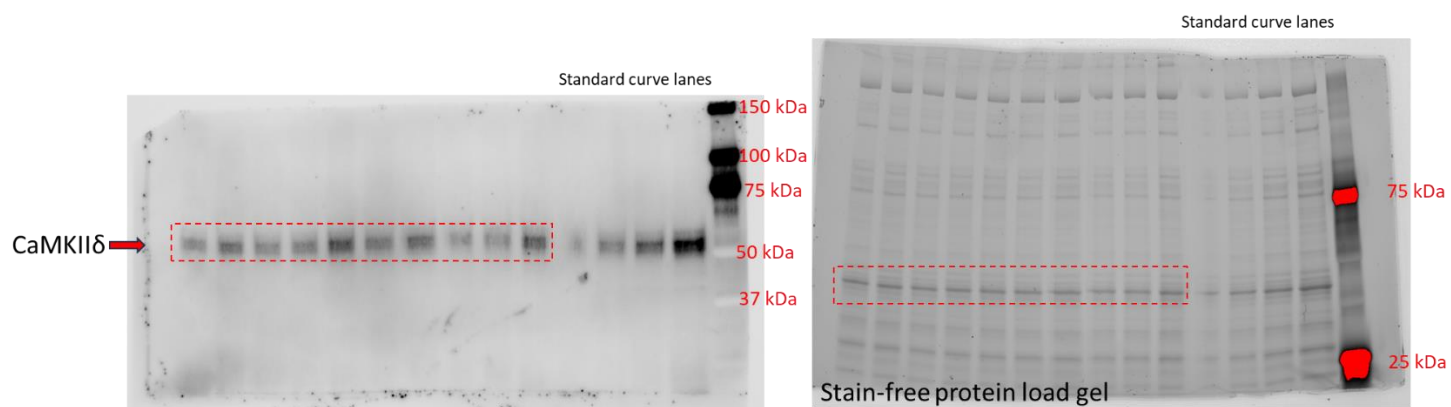**B****RyR/SERCA/ $\beta$ -actin**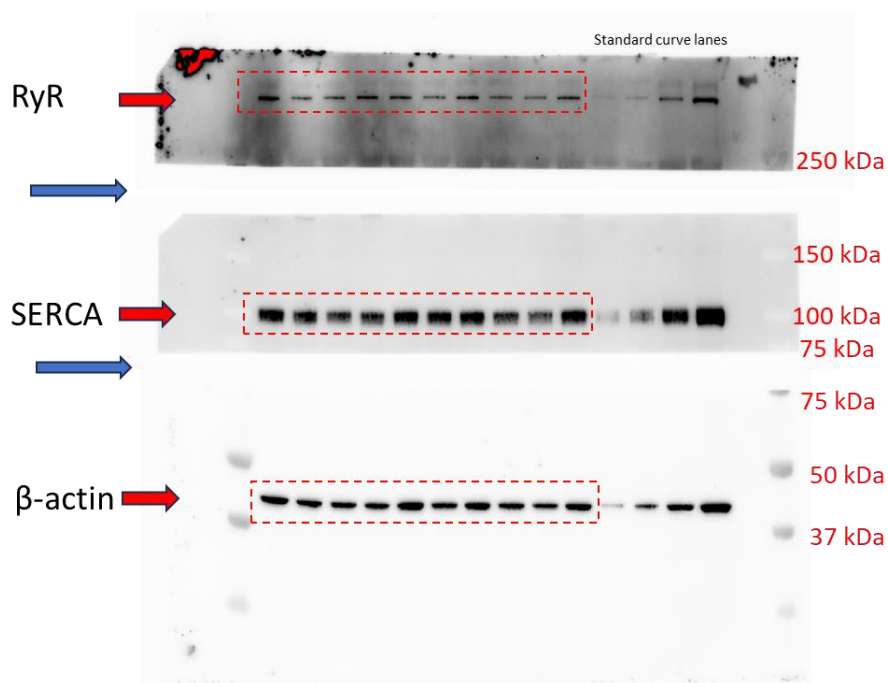

Full uncropped immunoblots of (A) CaMKII $\delta$  and (B) RyR/SERCA/ $\beta$ -actin from **Figure 3D**. Blue arrows indicate where the membrane was cut if applicable. The red-dotted rectangle indicates the portion of the blot displayed in the manuscript. Standard curve lanes are included to ensure sample reactivity is above background and below saturation.
